# Supplementary material for: An Integrated Multi-Omics Analysis Defines Key Pathway Alterations in a Diet-Induced Obesity Mouse Model
Source: PubMed Central journal article supplement (PMC7143281; doi:10.3390/metabo10030080), 2020-02-25

**Supporting Table 1.** Body and selected organ weights.

| Mouse ID | Diet | Weight (g) |        |       |        |
|----------|------|------------|--------|-------|--------|
|          |      | Body       | Kidney | Liver | Spleen |
| 1        | LFD  | 32.4       | 0.383  | 1.11  | 0.064  |
| 2        | LFD  | 29.5       | 0.381  | 1.05  | 0.05   |
| 3        | LFD  | 30.1       | 0.316  | 1.04  | 0.057  |
| 4        | LFD  | 33.7       | 0.379  | 1.24  | 0.067  |
| 5        | LFD  | 28.3       | 0.314  | 0.93  | 0.044  |
| 6        | LFD  | 30.2       | 0.32   | 1.06  | 0.058  |
| 7        | LFD  | 32.7       | 0.357  | 1.20  | 0.055  |
| 8        | LFD  | 31         | 0.325  | 1.03  | 0.062  |
| 9        | LFD  | 36.4       | 0.374  | 1.29  | 0.065  |
| 10       | LFD  | 31.4       | 0.35   | 1.05  | 0.059  |
| 11       | HFD  | 49.2       | 0.4    | 1.81  | 0.07   |
| 12       | HFD  | 35.9       | 0.337  | 0.86  | 0.055  |
| 13       | HFD  | 50.8       | 0.441  | 2.27  | 0.084  |
| 14       | HFD  | 51.4       | 0.405  | 1.93  | 0.058  |
| 15       | HFD  | 49.5       | 0.473  | 1.15  | 0.103  |
| 16       | HFD  | 48         | 0.474  | 1.32  | 0.098  |
| 17       | HFD  | 49.1       | 0.367  | 1.82  | 0.075  |
| 18       | HFD  | 50.1       | 0.493  | 1.47  | 0.062  |
| 19       | HFD  | 47         | 0.406  | 1.89  | 0.072  |
| 20       | HFDs | 47         | 0.394  | 1.29  | 0.068  |

**Supporting Table 2.** Fold change of the gene expression in liver. Significance levels tested by one-way ANOVA with Benjamini-Hochberg correction. The false discovery rate-corrected  $q < 0.05$  was considered significant: \*  $q < 0.05$ , \*\*  $q < 0.01$

| Metabolite | LFD | HFD   |
|------------|-----|-------|
| Mdh1       | 1   | 0.90  |
| Mdh2       | 1   | 0.86* |
| Pcx        | 1   | 1.03  |
| Pdha1      | 1   | 1.04  |
| Pdha2      | 1   | 0.93  |
| Pdhb       | 1   | 1.36* |
| Dlat       | 1   | 1.05  |
| Dld        | 1   | 0.99  |
| Pdhx       | 1   | 0.93  |
| Pdk1       | 1   | 1.30  |
| Pdk2       | 1   | 0.87  |
| Pdk3       | 1   | 1.35  |
| Pdk4       | 1   | 0.76  |
| Cs         | 1   | 1.12  |
| Aco2       | 1   | 0.88  |
| Idh3a      | 1   | 1.10  |
| Idh3b      | 1   | 0.88* |
| Idh3g      | 1   | 0.97  |
| Idh2       | 1   | 0.87  |
| Ogdh       | 1   | 1.36  |
| Dlst       | 1   | 0.83* |
| Dld        | 1   | 0.99  |
| Suclg1     | 1   | 0.78* |
| Suclg2     | 1   | 1.25* |
| Sdha       | 1   | 1.02  |
| Sdhb       | 1   | 0.92  |
| Sdhc       | 1   | 0.96  |
| Sdhd       | 1   | 0.74* |
| Fh1        | 1   | 1.27* |

## Supporting figure 1

Multi-block PCA. Block scores (Blue: LFD; Green: HFD) and loadings; A-B) metadata, C-D) NMR urine metabolomics, E-F) NMR serum metabolomics, G-H) HRMAS NMR liver metabolomics on intact tissue, I-J) NMR metabolomics of liver methanol:water fraction, K-L) NMR metabolomics of liver CHCl<sub>3</sub> fraction, M-N) NMR metabolomics of adipose methanol:water fraction, O-P) NMR metabolomics of adipose CHCl<sub>3</sub> fraction, Q-R) LC-MS metabolomics of urine, S-T) LC-MS metabolomics of serum, U-V) LC-MS metabolomics of liver methanol:water fraction, W-X) LC-MS metabolomics of muscle methanol:water fraction, Y-Z) GC-MS metabolomics of liver methanol:water fraction, AA-BB) GC-MS metabolomics of muscle methanol:water fraction. Assignments: 1, Body weight; 2, Mass of liver; 3, Blood total bilirubin; 4, Blood calcium; 5, Blood inorganic phosphorous; 6, Blood total Na; 7, Blood total Cl; 8, Trimethylamine; 9, Citrate; 10, Succinate; 11, Alanine; 12, Lipids; 13, Lactate; 14, Malate; 15, Taurine; 16, Choline; 17, Leucine; 18, 3-hydroxybutyrate; 19, Acetate; 20, Glycerol; 21, Glutaconic acid\*; 22, Vinylacetylglycine\*; 23, Phenylalanyltryptophan\*; 24, N-Heptanoylglycine\*; 25, Fumaric acid\*; 26, cis-Aconitic acid\*; 27, Indoleacrylic acid\*; 28, Imidazole acetol-phosphate\*; 29, PC(14:0/20:2)\*; 30, PC(18:1/22:6)\*; 31, Phosphate; 32, Threonine; 33, Glycine; 34, Phenylalanine; 35, Isoleucine; 36, Creatinine; 37, 2-oxo-proline. \*: tentative assignments based on molecular weight.

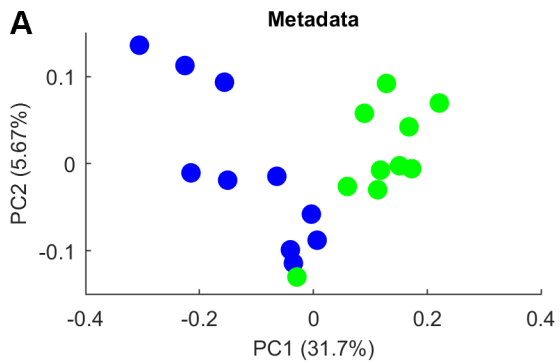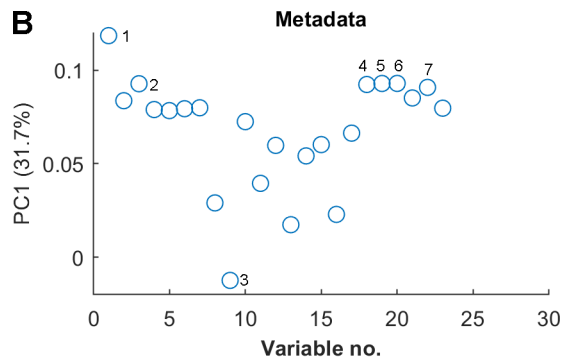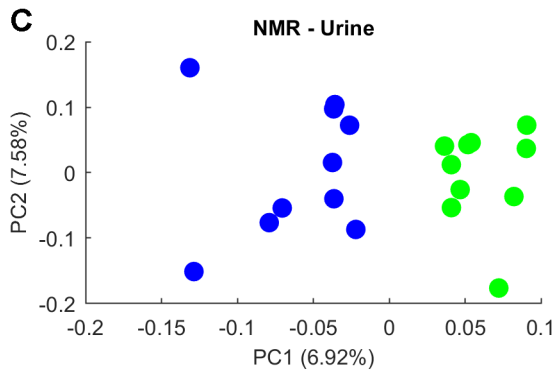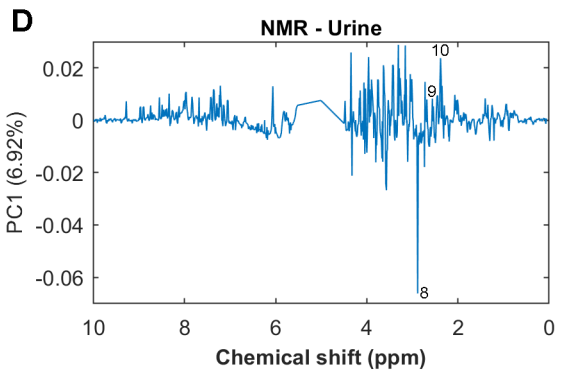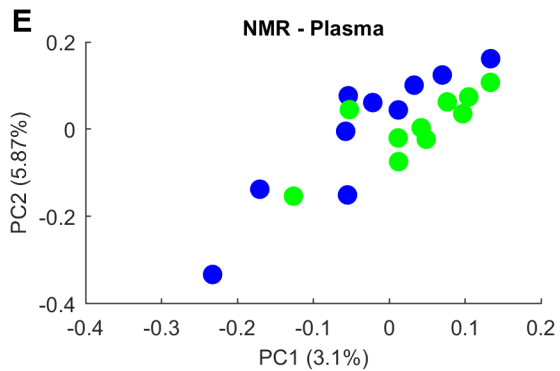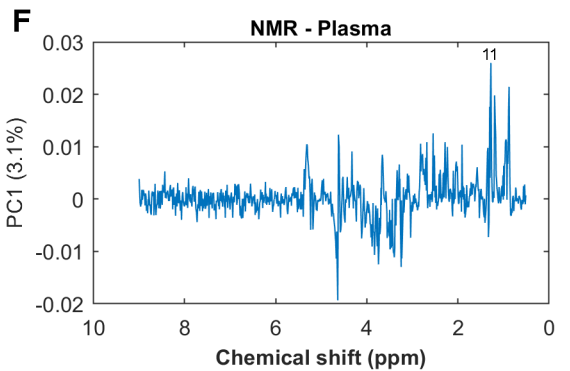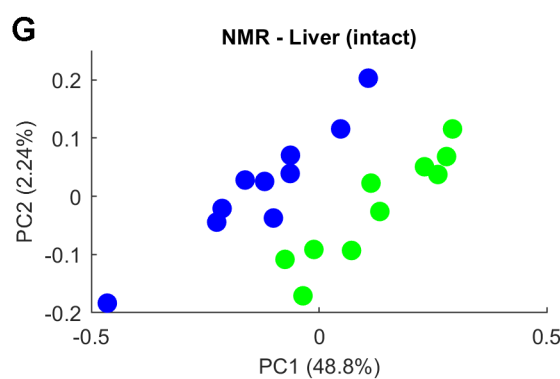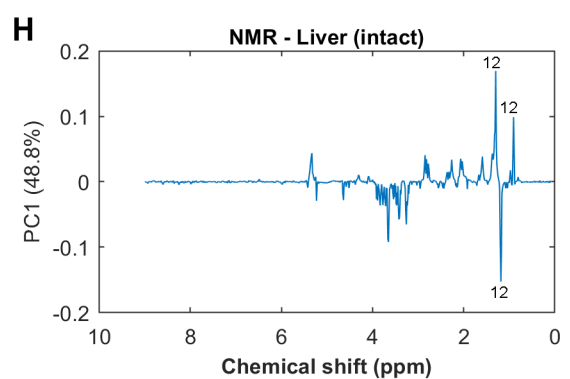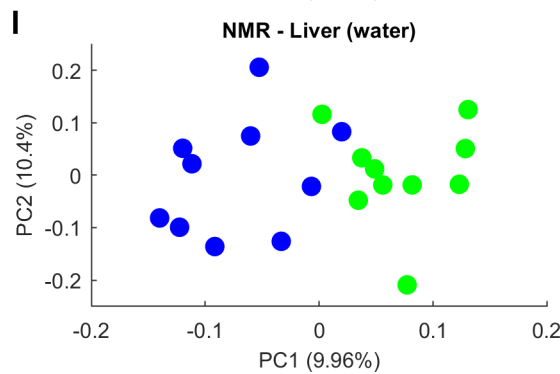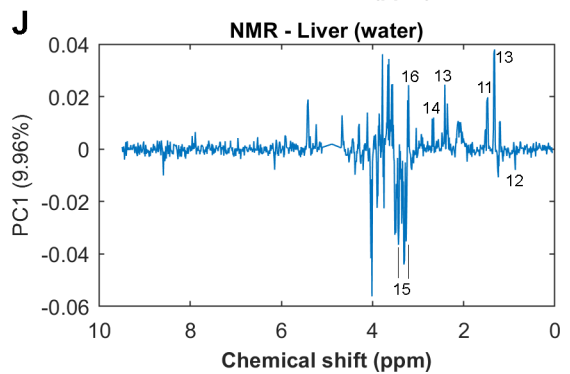

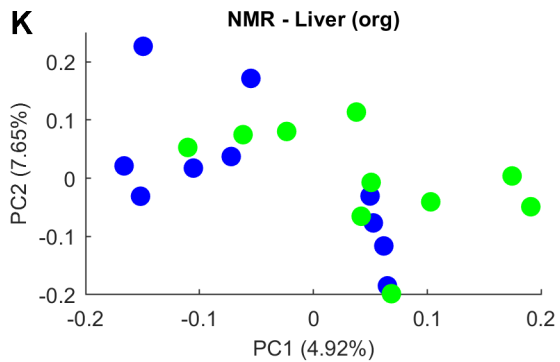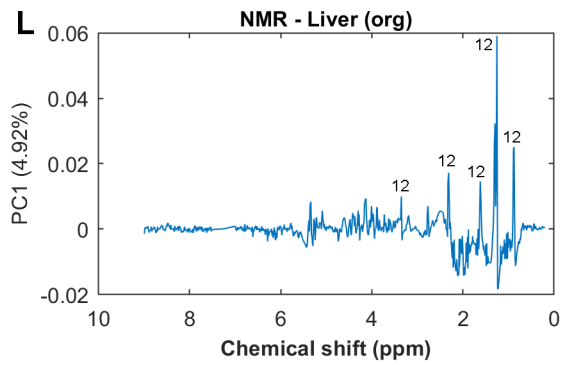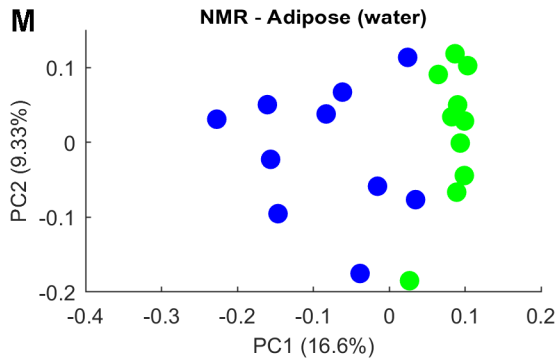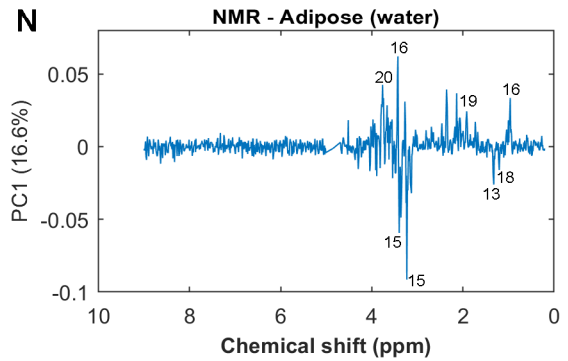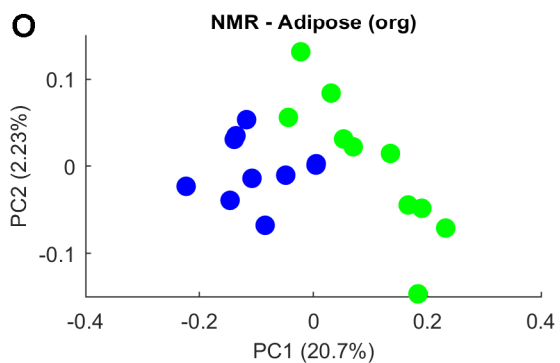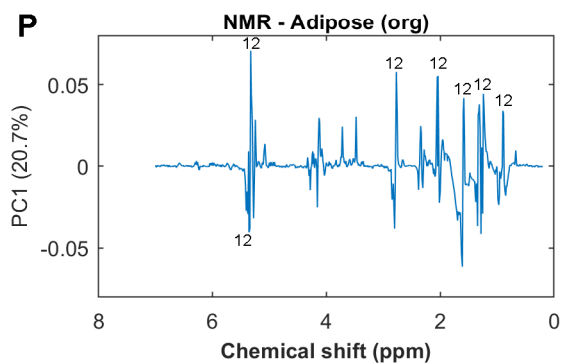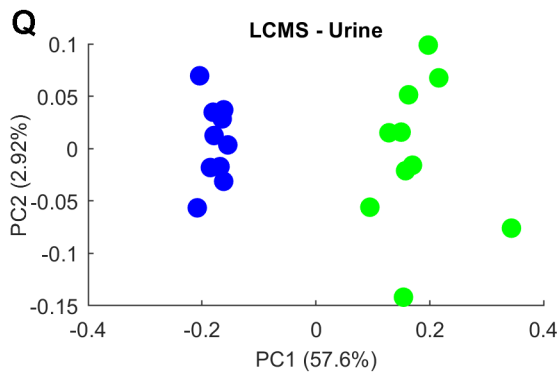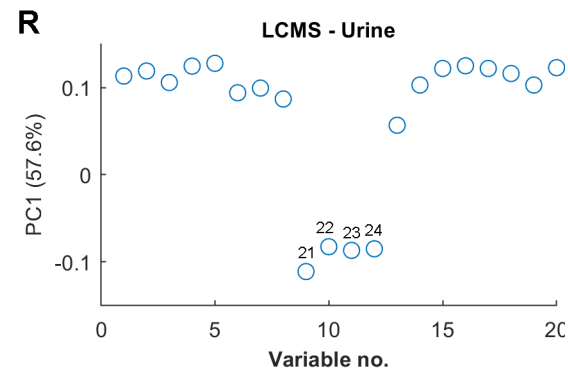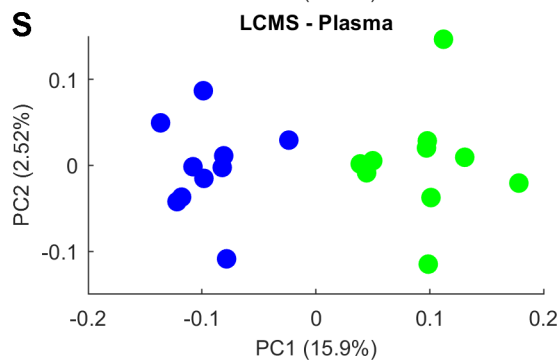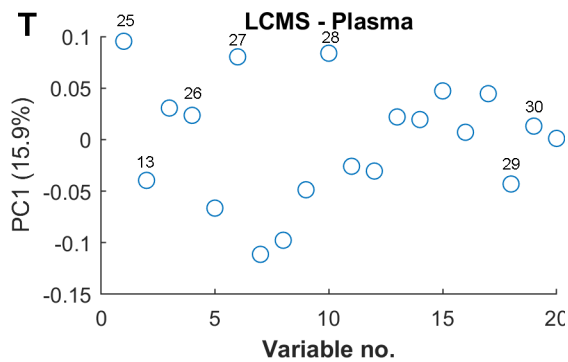

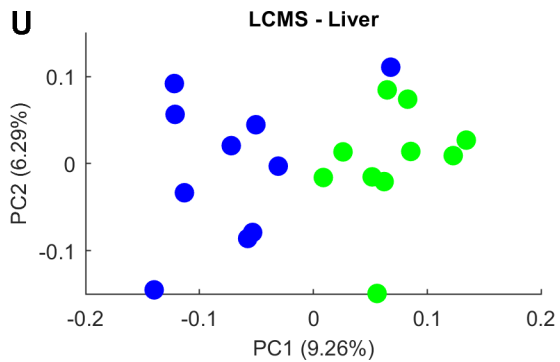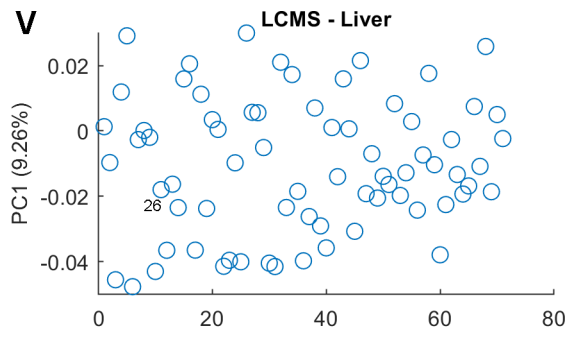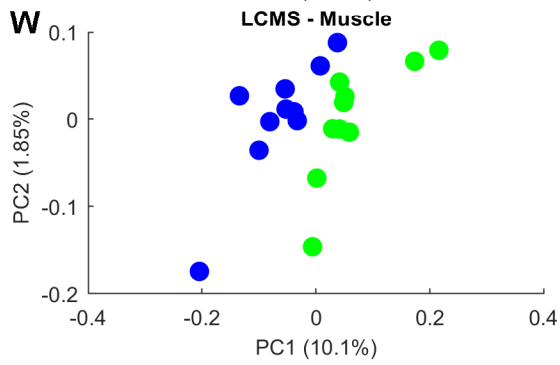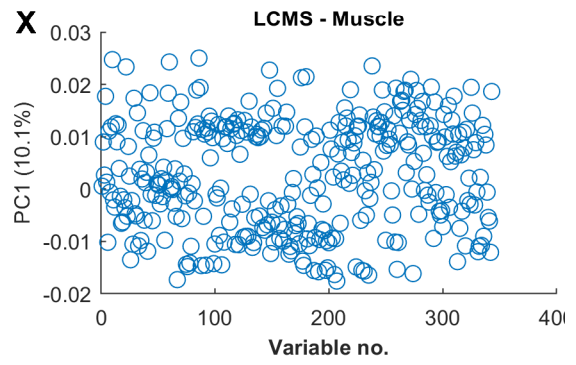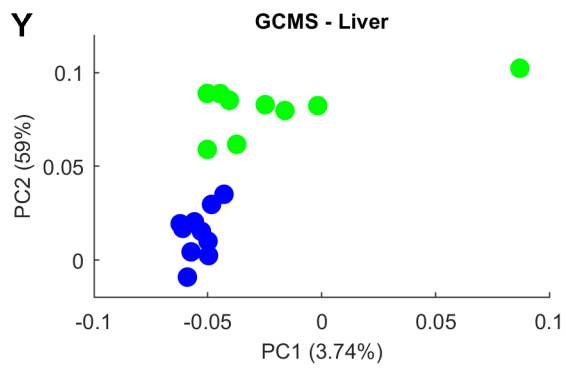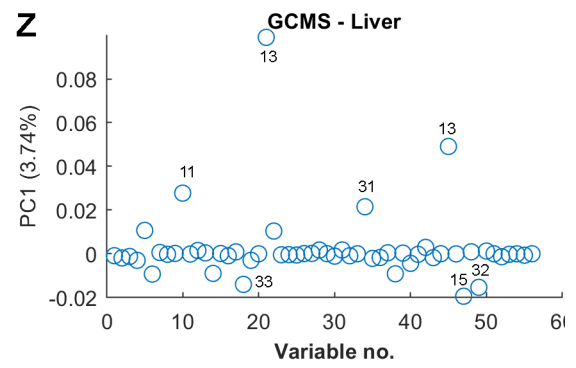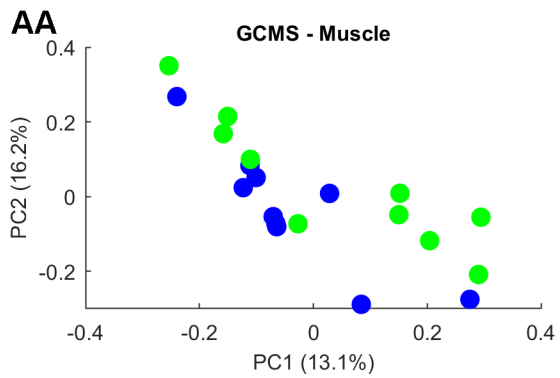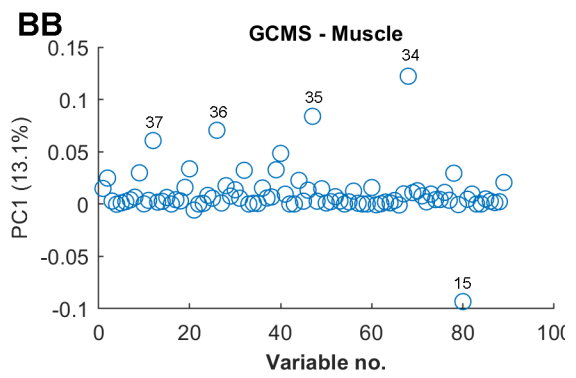

Supplement: metabolites-10-00080-s001.pdf [file metabolites-10-00080-s001.pdf]
